# Supplementary material for: Improvements in electrical and electrochemical properties of Nb-doped SnO2−δ supports for fuel cell cathodes due to aggregation and Pt loading
Source: Royal Society of Chemistry journal article supplement (doi:10.1039/c4ra03988b), 2014-01-01
Supplement: c4ra03988b1.pdf [file c4ra03988b1.pdf]

The kinetically controlled current densities of the catalysts ( $j_{k,Pt}$ ) estimated by the Koutecky - Levich plot (Fig. 11) can be used to evaluate the catalytic activity without the effect of the solution phase mass transport, as described in previous publications [Ref. 39 C. Coutanceau, M. J. Croissant, T. Napporn, C. Lamy, *Electrochim. Acta* 2000, **46**, 579-588.].

The Koutecky - Levich plot is based on equation s-1.

$$\begin{aligned} i^{-1} &= i_L^{-1} + i_k^{-1} \\ &= (0.620 nFAcD^{2/3} \nu^{-1/6} \omega^{1/2})^{-1} + i_k^{-1} \end{aligned} \quad (s-1)$$

|          |                                                                                    |
|----------|------------------------------------------------------------------------------------|
| $i_k$    | kinetically controlled current                                                     |
| $i_L$    | diffusion-limited current defined by above relation                                |
| $I$      | measured current                                                                   |
| $n$      | electron number of ORR                                                             |
| $F$      | Faraday's constant (96487 C mol <sup>-1</sup> )                                    |
| $A$      | geometric surface area of electrode (cm <sup>2</sup> )                             |
| $c$      | concentration of O <sub>2</sub> (mol cm <sup>-3</sup> )                            |
| $D$      | diffusion coefficient of O <sub>2</sub> (cm <sup>2</sup> s <sup>-1</sup> )         |
| $\nu$    | kinematic viscosity of the electrolyte solution (cm <sup>2</sup> s <sup>-1</sup> ) |
| $\omega$ | rotation rate of the disk electrode (rad s <sup>-1</sup> )                         |

We also evaluated the catalytic activity by use of equation (s-2) without a Koutecky - Levich plot. This method directly removes the effect of the diffusion-limited current that is actually measured and yields a limiting current-corrected Tafel plot. This method takes into consideration not only the diffusion of oxygen in solution but also any mass transport effects on the surface of the rotating electrode.

$$i_k = i \times i_L / (i_L - i) \quad (s-2)$$

|       |                                    |
|-------|------------------------------------|
| $i_k$ | the kinetically controlled current |
| $i_L$ | measured diffusion-limited current |
| $i$   | measured current                   |

We show a comparison of these two methods in Fig. S1 as a representative result of our sample (sample C). The kinetically controlled currents obtained by both methods showed good correspondence. Moreover, we also showed a similar comparison for the case of the commercial

catalyst Pt/CB (TEC10E50E, from Ref. 40) in Fig. S2. The kinetically controlled currents  $i_k$  evaluated with equations s-1 and s-2 are quite comparable, so we adopted the Koutecky - Levich plot to evaluate the kinetically controlled current in this work.

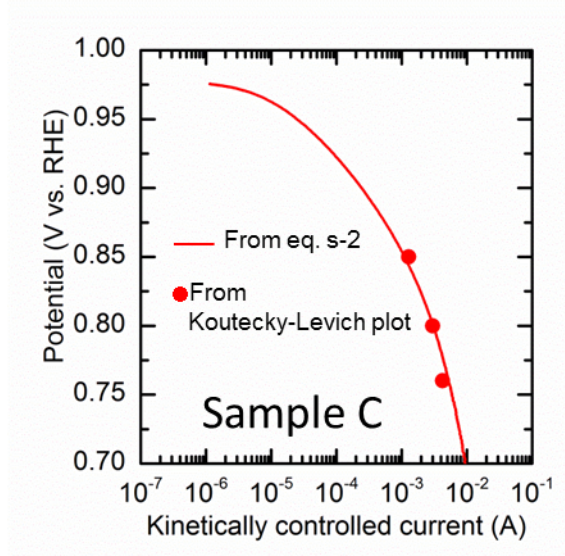

Fig. S1. Comparison between the Tafel plots for the kinetically controlled currents obtained by use of Koutecky - Levich plots (dots) and those obtained by use of equation s-2 (solid line, 1750 rpm) for the case of our sample C.

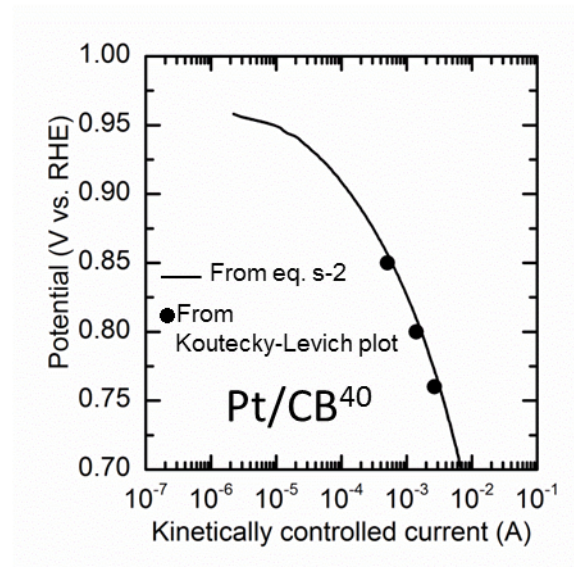

Fig. S2 Comparison between the kinetically controlled current obtained by use of Koutecky - Levich plot (dot) and that of obtained by use of equation s-2 (solid line, 1750rpm) in case of ref. 40.
